# Supplementary material
Source: PubMed Central journal article supplement (PMC6112006)
Supplement: zjb999094869s1.pdf [file zjb999094869s1.pdf]

1 Supporting information for:

2 **A defective undecaprenyl pyrophosphate synthase induces growth and**  
3 **morphological defects that are suppressed by mutations in the isoprenoid**  
4 **pathway of *Escherichia coli***

5

6 William J. MacCain<sup>1</sup>, Suresh Kannan<sup>1</sup>, Dannah Z. Jameel<sup>2</sup>, Jerry M. Troutman<sup>2</sup> and Kevin D.  
7 Young<sup>1</sup>\*

8

9 <sup>1</sup>Department of Microbiology and Immunology, University of Arkansas for Medical Sciences,  
10 Little Rock, AR 72205, USA

11 <sup>2</sup>Department of Chemistry, University of North Carolina Charlotte  
12 Charlotte, NC 28223, USA

13

14 \*Corresponding author, E-mail: [kdyoung@uams.edu](mailto:kdyoung@uams.edu)

15 Co-authors' e-mails: [WJMaccain@uams.edu](mailto:WJMaccain@uams.edu), [Jerry.Troutman@uncc.edu](mailto:Jerry.Troutman@uncc.edu)

16 **Supplemental Table 1. *E. coli* strains**

| Strain            | Relevant features                                                                                                    | Source or reference |
|-------------------|----------------------------------------------------------------------------------------------------------------------|---------------------|
| C41-pWJM3         | C41/pWJM3                                                                                                            | This work           |
| C41-pWJM4         | C41/pWJM4                                                                                                            | This work           |
| CS109             | <i>ispH269 uppS31 acnA522 intQ261 rpoS33 ygeN195 rph-1 zff::IS1 (IS-idi) zdc::IS2 zec::IS5 F-</i> (W1485 background) | (6), Lab collection |
| CS-pDEV           | CS109/pDEV                                                                                                           | (2)                 |
| CS-pDKR1          | CS109/pDKR1                                                                                                          | (2)                 |
| CS-pDSW204        | CS109/pDSW204                                                                                                        | This work           |
| CS-pMAJ9          | CS109/pMAJ9                                                                                                          | (3)                 |
| CS-pUppS          | CS109/pUppS                                                                                                          | This work           |
| MG1655            | F- lambda- <i>ilvG rfb-50 rph-1 zec::IS5</i>                                                                         | Lab collection      |
| SKCS104           | CS109 <i>ygfT Δintgen::ftr:kan:ftr uacT</i>                                                                          | This work           |
| SKCS106           | CS109 No-IS1 <i>ΔuacT::kan</i>                                                                                       | This work           |
| SKCS122           | CS109 <i>uppS<sup>+</sup> ΔbtuF::kan</i>                                                                             | This work           |
| SKCS156           | SKCS156 <i>uppS<sup>+</sup> ΔbtuF::ftr</i>                                                                           | This work           |
| SKCS156-pDEV      | SKCS156/pDEV                                                                                                         | This work           |
| SKCS156-pDKR1     | SKCS156/pDKR1                                                                                                        | This work           |
| SKCS183           | CS109 <i>ispH<sup>+</sup> ΔthrC::kan</i>                                                                             | This work           |
| SKCS195           | CS109 <i>uppS<sup>+</sup> ispH<sup>+</sup></i>                                                                       | This work           |
| SKMG124           | MG1655 <i>Δidi::kan</i>                                                                                              | This work           |
| SKMG126           | MG1655 <i>ygfT Δintgen::ftr:kan:ftr uacT zff::IS1 (IS-idi)</i>                                                       | This work           |
| SKMG142           | MG1655 <i>uppS31 ΔbtuF::kan</i>                                                                                      | This work           |
| SKMG143           | MG1655 <i>ispH269 ΔthrC::kan</i>                                                                                     | This work           |
| SKMG173           | MG1655 <i>uppS31 ΔbtuF::ftr</i>                                                                                      | This work           |
| SKMG198           | MG1655 <i>uppS31 ispH269</i>                                                                                         | This work           |
| SKMG198-pBBR1MC-3 | SKMG198/pBBR1MC-3                                                                                                    | This work           |
| SKMG198-pMEVB     | SKMG198/pMEVB                                                                                                        | This work           |
| WJM8              | CS109 <i>Δidi::kan</i>                                                                                               | This work           |
| WJM11             | SKMG173 <i>Δidi::kan</i>                                                                                             | This work           |
| WJM12             | SKMG198 <i>Δidi::kan</i>                                                                                             | This work           |
| WJM16             | SKCS156 <i>idi<sup>+</sup></i>                                                                                       | This work           |
| WJM17             | SKCS156 <i>Δidi::kan</i>                                                                                             | This work           |
| WJM19             | SKCS183 <i>ispH<sup>+</sup> ΔthrC::ftr</i>                                                                           | This work           |
| WJM21             | SKMG143 <i>ispH269 ΔthrC::ftr</i>                                                                                    | This work           |
| WJM25             | WJM21 <i>Δidi::kan</i>                                                                                               | This work           |
| WJM27             | SKCS195 <i>idi<sup>+</sup></i>                                                                                       | This work           |
| WJM29             | SKCS195 <i>IS-idi</i>                                                                                                | This work           |
| WJM30             | WJM21 <i>IS-idi</i>                                                                                                  | This work           |
| WJM31             | WJM19 <i>idi<sup>+</sup></i>                                                                                         | This work           |
| WJM32             | SKMG173 <i>IS-idi</i>                                                                                                | This work           |
| WJM33             | SKMG198 <i>IS-idi</i>                                                                                                | This work           |
| WJM34             | CS109 <i>idi<sup>+</sup></i>                                                                                         | This work           |

18 **Supplemental Table 2. Plasmids**

| Plasmid   | Relevant features                                                                           | Source or Reference |
|-----------|---------------------------------------------------------------------------------------------|---------------------|
| pBBR1MC-3 | TetR                                                                                        | (5)                 |
| pCP20     | FLP <sup>+</sup> $\lambda$ ci857 <sup>+</sup> $\lambda$ P <sub>R</sub> Rep(Ts) AmpR<br>CamR | (1)                 |
| pDEV      | <i>lacI<sup>q</sup></i> P <sub>lac</sub> , KanR                                             | (7)                 |
| pDKR1     | pDEV- <i>rprA::sfGFP</i>                                                                    | (7)                 |
| pDSW204   | pBR322 <i>lacI<sup>q</sup></i> P <sub>lac</sub> , AmpR                                      | (8)                 |
| pET24B    | pBR322 P <sub>lac</sub> , KanR                                                              | (Novagen)           |
| pMAJ9     | pDSW204- <i>uppS</i>                                                                        | (3)                 |
| pMEVB     | pBBR1MCS-3- <i>ERG12 ERG8</i><br><i>MVD1</i>                                                | (4)                 |
| pUppS31   | pDSW204- <i>uppS31</i>                                                                      | This work           |
| pWJM3     | pET24b- <i>uppS</i>                                                                         | This work           |
| pWJM4     | pET24b- <i>uppS31</i>                                                                       | This work           |

19

20 **Supplemental Table 3. Primers**

| Primer                  | Sequence (5'-to-3')                                          |
|-------------------------|--------------------------------------------------------------|
| idi check F             | TTTTTACCTGTCGGCATCCG                                         |
| idi check R             | TTACGTTATGCTCACAACCCCG                                       |
| Intergenic kan-idi H1P1 | CTTTCATTATTTCAACATTGCCGATCAAAAGAGCGCTATCATTCCGGGGATCCGTCGACC |
| Intergenic kan-idi H2P2 | TCTGGCATGTCGCACTCTCGCATTTAATCGTTTTTATCTGTGTAGGCTGGAGCTGCTTCG |
| Intergenic kan-idi-F    | TTCGCGATGCAATAAACGGG                                         |
| Intergenic kan-idi-R    | GGAGTTAGAGACAGGAATTGCGGA                                     |
| uppS chk F              | CGCCATCTGATCGTAAGTAGTTGG                                     |
| uppS chk R              | GCGATGACGACGGGTATTAACA                                       |
| <i>ispH</i> chk F       | CGGGCAGACCGTTCATTTTGAT                                       |
| <i>ispH</i> chk R       | AAAATGCCGGTAACAAGACCGG                                       |
| <i>thrC</i> H1P1        | CCGGCTGGATACGGCGGGCGCACGAGTACTGGAAAATAAATCCGGGGATCCGTCGACC   |
| <i>thrC</i> H2P2        | TTGAGATAATGAATAGATTTTACTGATGATTCATCATCAATGTAGGCTGGAGCTGCTTCG |
| <i>thrC</i> chk F       | TCATATTTGCCGGCTGGATACG                                       |
| <i>thrC</i> chk R       | TGCATAAAAGCAAACCCGGC                                         |
| <i>btuF</i> H1P1        | GATGGTTGAGTCACTGGTGAGAACTTGCACATGGCTAATGTAGGCTGGAGCTGCTTCG   |
| <i>btuF</i> H2P2        | ATTTTAGGAATTTGGTCCGGTCCGCCTGTAATGACAATCGATTCCGGGGATCCGTCGACC |
| <i>btuF</i> chk F       | GCTAAACAGTCCAGCCTGATGGTT                                     |
| <i>btuF</i> chk R       | AGGCGCTAATCTACCTGTGAAAGC                                     |
| P21                     | CAGGAATTCTGTCTGCTACTCAACCACTTAG                              |
| P22                     | CTGAAGCTTTCAGGCTGTTTCATCACCGGG                               |
| uppS5'pET24b            | CAGCATATGTTGTCTGCTACTCAACCACTTAG                             |
| uppS3'RCpET24b          | CTGCTCGAGGGCTGTTTCATCACCGGGCTC                               |

21

22

## Supplemental References

- 23  
24  
25  
26 1. **Cherepanov, P. P., and W. Wackernagel.** 1995. Gene disruption in *Escherichia coli*: TcR and KmR  
27 cassettes with the option of Flp-catalyzed excision of the antibiotic-resistance determinant.  
28 *Gene* **158**:9-14.
- 29 2. **Evans, K. L., S. Kannan, G. Li, M. A. de Pedro, and K. D. Young.** 2013. Eliminating a set of four  
30 penicillin binding proteins triggers the Rcs phosphorelay and Cpx stress responses in *Escherichia*  
31 *coli*. *J Bacteriol* **195**:4415-4424.
- 32 3. **Jorgenson, M. A., S. Kannan, M. E. Laubacher, and K. D. Young.** 2016. Dead-end intermediates  
33 in the enterobacterial common antigen pathway induce morphological defects in *Escherichia coli*  
34 by competing for undecaprenyl phosphate. *Mol Microbiol* **100**:1-14.
- 35 4. **Martin, V. J., D. J. Pitera, S. T. Withers, J. D. Newman, and J. D. Keasling.** 2003. Engineering a  
36 mevalonate pathway in *Escherichia coli* for production of terpenoids. *Nat Biotechnol* **21**:796-  
37 802.
- 38 5. **Obranic, S., F. Babic, and G. Maravic-Vlahovicek.** 2013. Improvement of pBBR1MCS plasmids, a  
39 very useful series of broad-host-range cloning vectors. *Plasmid* **70**:263-267.
- 40 6. **Pugsley, A. P., D. Littmann-Louth, and C. A. Schnaitman.** 1979. Chromosomal location of the  
41 attachment site for the PA-2 prophage in *Escherichia coli* K-12. *J Virol* **29**:808-810.
- 42 7. **Ranjit, D. K., and K. D. Young.** 2013. The Rcs stress response and accessory envelope proteins  
43 are required for de novo generation of cell shape in *Escherichia coli*. *J Bacteriol* **195**:2452-2462.
- 44 8. **Weiss, D. S., J. C. Chen, J. M. Ghigo, D. Boyd, and J. Beckwith.** 1999. Localization of FtsI (PBP3)  
45 to the septal ring requires its membrane anchor, the Z ring, FtsA, FtsQ, and FtsL. *J Bacteriol*  
46 **181**:508-520.

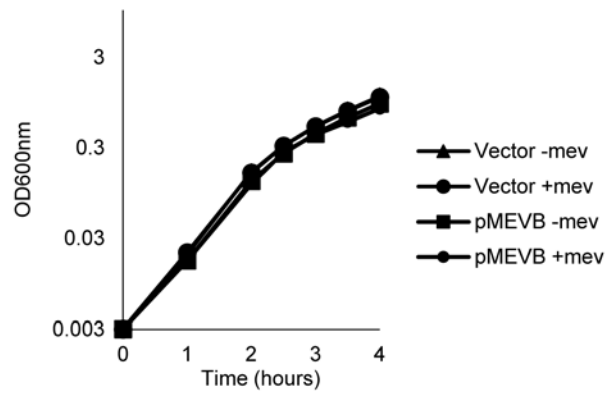

**Supplemental Figure 1. Mevalonate does not alter growth at 42°C.** SKMG198 with designated plasmids were grown overnight at 30°C and diluted to OD600nm 0.003 into LB at 42°C with (+) or without (-) 2.5 mM mevalonate. Vector = pBBR1MC-3; pMEVB = pMEVB.
